# Supplementary material for: Changes in Lutein Status Markers (Serum and Faecal Concentrations, Macular Pigment) in Response to a Lutein-Rich Fruit or Vegetable (Three Pieces/Day) Dietary Intervention in Normolipemic Subjects
Source: MDPI journal article supplement (doi:10.3390/nu13103614), 2021-10-15
Supplement: s1 [file s1]

## SUPPLEMENTARY MATERIAL

Table S1. Carotenoids dietary intake ( $\mu\text{mol/day}$ ).

|                        | Total sample (n=29)                   | Fruit group (n=14)                  | Vegetable group (n=15)                 |
|------------------------|---------------------------------------|-------------------------------------|----------------------------------------|
| Lutein + zeaxanthin    |                                       |                                     |                                        |
| Basal                  | $2.26 \pm 1.31$ [1.88] <sup>a</sup>   | $2.16 \pm 1.03$ [2.15]              | $2.35 \pm 1.56$ [1.88]                 |
| Final                  | $4.42 \pm 3.43$ [3.45] <sup>b</sup>   | $6.06 \pm 3.88$ [4.18] <sup>A</sup> | $3.09 \pm 1.99$ [2.73] <sup>B</sup>    |
| $\beta$ -cryptoxanthin |                                       |                                     |                                        |
| Basal                  | $1.25 \pm 1.07$ [0.93] <sup>a</sup>   | $1.52 \pm 1.15$ [1.73]              | $2.00 \pm 0.97$ [0.87]                 |
| Final                  | $1.13 \pm 1.04$ [0.96] <sup>b</sup>   | $2.00 \pm 0.78$ [1.71]              | $0.33 \pm 0.35$ [1.71]                 |
| $\alpha$ -carotene     |                                       |                                     |                                        |
| Basal                  | $0.89 \pm 1.51$ [0.40]                | $0.86 \pm 1.80$ [0.34]              | $0.92 \pm 1.24$ [0.40]                 |
| Final                  | $0.50 \pm 0.62$ [0.19]                | $0.47 \pm 0.48$ [0.24]              | $0.56 \pm 0.75$ [0.20]                 |
| $\beta$ -carotene      |                                       |                                     |                                        |
| Basal                  | $4.00 \pm 3.78$ [2.58]                | $3.67 \pm 4.54$ [2.52]              | $4.30 \pm 3.03$ [3.88]                 |
| Final                  | $3.83 \pm 3.72$ [2.71]                | $3.94 \pm 2.96$ [3.16]              | $4.00 \pm 4.45$ [2.44]                 |
| Lycopene               |                                       |                                     |                                        |
| Basal                  | $20.21 \pm 27.75$ [5.97] <sup>a</sup> | $3.04 \pm 2.12$ [2.61] <sup>A</sup> | $36.24 \pm 31.07$ [29.29] <sup>B</sup> |
| Final                  | $12.64 \pm 14.94$ [5.09] <sup>b</sup> | $3.94 \pm 1.92$ [3.76] <sup>A</sup> | $22.25 \pm 16.86$ [20.11] <sup>B</sup> |

Different superscript letters indicate significant difference between basal and final concentrations (<sup>a</sup> columns) and between groups (<sup>A</sup> rows).

Difference between fruit and vegetable groups at baseline: lycopene ( $<0.001$ ).

Differences between baseline and end of the study: a) total sample: lutein+zeaxanthin (0.002),  $\beta$ -cryptoxanthin ( $<0.001$ ) and lycopene (0.009); b) between fruit and vegetable groups: lutein+zeaxanthin (0.012) and lycopene ( $<0.001$ )

Table S2. Contrast threshold at different degrees of visual angle, without and with glare (means  $\pm$  SD).

| Visual angle of the stimulus (°) | Total sample (n=29) | Fruit group (n=14)             | Vegetable group (n=15)         |
|----------------------------------|---------------------|--------------------------------|--------------------------------|
| <i>Without glare</i>             |                     |                                |                                |
| 6.3                              |                     |                                |                                |
| Basal                            | 0.018 $\pm$ 0.013   | 0.020 $\pm$ 0.016              | 0.015 $\pm$ 0.008              |
| Final                            | 0.015 $\pm$ 0.007   | 0.016 $\pm$ 0.010              | 0.014 $\pm$ 0.005              |
| 4.0                              |                     |                                |                                |
| Basal                            | 0.022 $\pm$ 0.013   | 0.025 $\pm$ 0.015              | 0.020 $\pm$ 0.012              |
| Final                            | 0.020 $\pm$ 0.011   | 0.020 $\pm$ 0.010              | 0.020 $\pm$ 0.012              |
| 2.5                              |                     |                                |                                |
| Basal                            | 0.030 $\pm$ 0.018   | 0.033 $\pm$ 0.021              | 0.027 $\pm$ 0.015              |
| Final                            | 0.031 $\pm$ 0.019   | 0.033 $\pm$ 0.020              | 0.028 $\pm$ 0.018              |
| 1.6                              |                     |                                |                                |
| Basal                            | 0.056 $\pm$ 0.034   | 0.057 $\pm$ 0.034              | 0.054 $\pm$ 0.034              |
| Final                            | 0.057 $\pm$ 0.043   | 0.063 $\pm$ 0.043              | 0.051 $\pm$ 0.043              |
| 1.0                              |                     |                                |                                |
| Basal                            | 0.122 $\pm$ 0.083   | 0.125 $\pm$ 0.080              | 0.120 $\pm$ 0.090              |
| Final                            | 0.131 $\pm$ 0.092   | 0.145 $\pm$ 0.090              | 0.112 $\pm$ 0.094              |
| 0.7                              |                     |                                |                                |
| Basal                            | 0.273 $\pm$ 0.156   | 0.280 $\pm$ 0.161              | 0.268 $\pm$ 0.154              |
| Final                            | 0.287 $\pm$ 0.150   | 0.296 $\pm$ 0.156              | 0.278 $\pm$ 0.146              |
| <i>With glare</i>                |                     |                                |                                |
| 6.3                              |                     |                                |                                |
| Basal                            | 0.014 $\pm$ 0.005   | 0.014 $\pm$ 0.005              | 0.013 $\pm$ 0.005              |
| Final                            | 0.015 $\pm$ 0.006   | 0.016 $\pm$ 0.007 <sup>A</sup> | 0.013 $\pm$ 0.005 <sup>B</sup> |
| 4.0                              |                     |                                |                                |
| Basal                            | 0.022 $\pm$ 0.026   | 0.027 $\pm$ 0.036              | 0.016 $\pm$ 0.008              |
| Final                            | 0.018 $\pm$ 0.010   | 0.020 $\pm$ 0.011 <sup>A</sup> | 0.015 $\pm$ 0.008 <sup>B</sup> |
| 2.5                              |                     |                                |                                |
| Basal                            | 0.030 $\pm$ 0.015   | 0.028 $\pm$ 0.015              | 0.026 $\pm$ 0.015              |
| Final                            | 0.019 $\pm$ 0.017   | 0.032 $\pm$ 0.015              | 0.026 $\pm$ 0.018              |
| 1.6                              |                     |                                |                                |
| Basal                            | 0.058 $\pm$ 0.039   | 0.061 $\pm$ 0.043              | 0.055 $\pm$ 0.035              |
| Final                            | 0.059 $\pm$ 0.040   | 0.059 $\pm$ 0.031              | 0.059 $\pm$ 0.048              |
| 1.0                              |                     |                                |                                |
| Basal                            | 0.127 $\pm$ 0.082   | 0.124 $\pm$ 0.078              | 0.130 $\pm$ 0.090              |
| Final                            | 0.143 $\pm$ 0.106   | 0.155 $\pm$ 0.109              | 0.133 $\pm$ 0.104              |
| 0.7                              |                     |                                |                                |
| Basal                            | 0.300 $\pm$ 0.106   | 0.290 $\pm$ 0.149              | 0.309 $\pm$ 0.139              |
| Final                            | 0.302 $\pm$ 0.162   | 0.295 $\pm$ 0.165              | 0.309 $\pm$ 0.029              |
